# Supplementary material
Source: PubMed Central journal article supplement (PMC3522149)
Supplement: 2f428371174c0a738239da260abf3ae5_genetics.112.143925-5.pdf [file 2f428371174c0a738239da260abf3ae5_genetics.112.143925-5.pdf]

**Table S1 Sequences of oligonucleotides that were used**

---

| <b>to synthesize dsRNA</b>                    |                                                  |
|-----------------------------------------------|--------------------------------------------------|
| #22M: tra-2_ds_FOR                            | TAATACGACTCACTATAGGGCGAAGTCGTAGTCGCAGCCGTAGTCGTT |
| #23M: tra-2_ds_REV                            | TAATACGACTCACTATAGGGCGACTGGTGTGGTGTATGAGCTCGTTG  |
| #591                                          | TAATACGACTCACTATAGGGAGTCGTAGTGCAAGTCCTAGAAGACC   |
| #592                                          | TAATACGACTCACTATAGGGATTTCCCTGTTTCCAACATGAC       |
| <b>to analyze <i>Am-dsx</i> splicing</b>      |                                                  |
| #417                                          | CTATTGGAGCACAGTAGCAAACCTTG                       |
| #418                                          | GGCTACGTATGTTTAGGAGGACC                          |
| #419                                          | GAAACAATTTTGTTCAAAATAGAATTCC                     |
| <b>to analyze <i>fem</i> splicing</b>         |                                                  |
| #412                                          | CTGATTTTTCAATATTTACAGCTAAAACCTGTAC               |
| #523                                          | CAACATCTGATGAACTTAAACGG                          |
| #410                                          | TGAAGTTAATAACATATTTTAAATTCATCAATGAAG             |
| #566                                          | TGTACCATCTGAAGATTCTAATTTTTTCG                    |
| <b>to amplify <i>elongation factor-1α</i></b> |                                                  |
| #EM033                                        | CGTTCGTACCGATCTCCGGATG                           |
| #EM034                                        | GCTGCTGGAGCGAATGTTAC                             |
| <b>in 5'RACE experiments</b>                  |                                                  |
| 5'RACE OLLI:                                  | TGAACGGCTTCGTG                                   |
| <b>in 3'RACE experiments</b>                  |                                                  |
| #33M (3'RACE J1 OUTER)                        | ACT CTC GCG AAT GTG ATA GGA CCA T                |
| #34M (3'RACE J2 INNER)                        | TCA CAC TCC CGC AGT CCA ATG TCA T                |
| 3'RACE OLLI                                   | AGAACAGTGTGCAG                                   |
| <b>to clone full ORF of <i>Am-tra2</i></b>    |                                                  |
| #359                                          | GATCGGATCCATGAGTGACATTGAGCGAAGTAGTAG             |
| #421                                          | TGACACGCGTTTAAATATCGACGTGGTGAATAAGAGC            |
| <b>to amplify <i>csd</i> transcripts</b>      |                                                  |
| #CS-1                                         | ATGAAAAGAAAACCTTTTAGAAGAAAGAAC                   |
| #CS-2                                         | TAAAATTTTATAGTTTTCATTGATGCGTAG                   |

---
