# Supplementary material
Source: PubMed Central journal article supplement (PMC3522149)
Supplement: 5bcfc3b5ae8c2ad1d6bd34780324ae50_genetics.112.143925-6.pdf [file 5bcfc3b5ae8c2ad1d6bd34780324ae50_genetics.112.143925-6.pdf]

```

Am-tra2285 TACTGACGCC ACAGCGCATT GTTCTGAACG TTTAATCGGT TTTTGCTACA TTTATTCTAT TTAAGTTTC ATAATGAGTG ACATTGAGCG
Am-tra2253 TACTGACGCC ACAGCGCATT GTTCTGAACG TTTAATCGGT TTTTGCTACA TTTATTCTAT TTAAGTTTC ATAATGAGTG ACATTGAGCG
Am-tra2234 TACTGACGCC ACAGCGCATT GTTCTGAACG TTTAATCGGT TTTTGCTACA TTTATTCTAT TTAAGTTTC ATAATGAGTG ACATTGAGCG

Am-tra2285 AAGTAGTAGT CGTAGTGCAA GTCCTAGAAG ACCAAGAACA GCAGATGGTG GTTTAAGAGA CTCGCGTTCA CATTCAAGAT CACGTAAATC ACGAGAGCGT
Am-tra2253 AAGTAGTAGT CGTAGTGCAA GTCCTAGAAG ACCAAGAACA GCAGATGGTG GTTTAAGAGA CTCGCGTTCA CATTCAAGAT CACGTAAATC ACGAGAGCGT
Am-tra2234 AAGTAGTAGT CGTAGTGCAA GTCCTAGAAG ACCAAGAACA GCAGATGGTG GTTTAAGAGA CTCGCGTTCA CATTCAAGAT CACGTAAATC ACGAGAGCGT

Am-tra2285 AAAGAATCGC ACCGACCAGT AAAAGAATAT TCAAGATCAC GAAGCCGTTT AGTGTCAAGA GGAAGAAAGT CCTATCGTAG CAGCAAATAT GCCAGTGCAG
Am-tra2253 AAAGAATCGC ACCGACCAGT AAAAGAATAT TCAAGATCAC GAAGCCGTTT AGTGTCAAGA GGAAGAAAGT CCTATCGTAG CAGCAAATAT GCCAGTGCAG
Am-tra2234 AAAGAATCGC ACCGACCAGT AAAAGAATAT TCAAGATCAC GAAGCCGTTT AGTGTCAAGA GGAAGAAAGT CCTATCGTAG CAGCAAATAT GCCAGTGCAG

Am-tra2285 GTCATCGTGG TAGTAGTCGC AGTCGTAGTC GCAGCCGTAG TCGTTCTACT CACAGGTTTG CGCGATATTC CGAAGCAGA TCTCGATCAT ACTTCCGTTT
Am-tra2253 GTCATCGTGG TAGTAGTCGC AGTCGTAGTC GCAGCCGTAG TCGTTCTACT CACAG----- ----- ----- ----- -----
Am-tra2234 GTCATCGTGG TAGTAGTCGC AGTCGTAGTC GCAGCCGTAG TCGTTCTACT CACAG----- ----- ----- ----- -----

Am-tra2285 TCGTTACTCT CGCGAATGTG ATAGGACCAT TTAGTCTTCA CACTCCCCTG GTCCAATGTC ATCTAGACGA CGTCATGTTG GAAACAGGGA AAATCCCTCT
Am-tra2253 ----- ----- ----- ----- ----- -TCCAATGTC ATCTAGACGA CGTCATGTTG GAAACAGGGA AAATCCCTCT
Am-tra2234 ----- ----- ----- ----- ----- -TCCAATGTC ATCTAGACGA CGTCATGTTG GAAACAGGGA AAATCCCTCT

Am-tra2285 CCTTCCAGAT GCTTAGGTGT ATTTGGACTT TCTATTTTTA CAACCGAACA GCAAGTACAT CACATCTTTT CCAAATATGG TCCTGTTGAA CGTATACAAG
Am-tra2253 CCTTCCAGAT GCTTAGGTGT ATTTGGACTT TCTATTTTTA CAACCGAACA GCAAGTACAT CACATCTTTT CCAAATATGG TCCTGTTGAA CGTATACAAG
Am-tra2234 -----AT GCTTAGGTGT ATTTGGACTT TCTATTTTTA CAACCGAACA GCAAGTACAT CACATCTTTT CCAAATATGG TCCTGTTGAA CGTATACAAG

Am-tra2285 TTGTAATTGA TGCAAAGACT GGGCATTCTA AAGGATATTG TTTTGATAT TTTGAATCAC TTGAAGATGC TAAAGTAGCA AAAGAACAGT GTGCAGGAAT
Am-tra2253 TTGTAATTGA TGCAAAGACT GGGCATTCTA AAGGATATTG TTTTGATAT TTTGAATCAC TTGAAGATGC TAAAGTAGCA AAAGAACAGT GTGCAGGAAT
Am-tra2234 TTGTAATTGA TGCAAAGACT GGGCATTCTA AAGGATATTG TTTTGATAT TTTGAATCAC TTGAAGATGC TAAAGTAGCA AAAGAACAGT GTGCAGGAAT

Am-tra2285 GGAAATTGAT GGTAGAAGAA TGAGGGTAGA TTATTC AATT ACACAACGAG CTCATACACC AACACCAGGA ATATATTTAG GAAAACCTAC ACATTTACAT
Am-tra2253 GGAAATTGAT GGTAGAAGAA TGAGGGTAGA TTATTC AATT ACACAACGAG CTCATACACC AACACCAGGA ATATATTTAG GAAAACCTAC ACATTTACAT
Am-tra2234 GGAAATTGAT GGTAGAAGAA TGAGGGTAGA TTATTC AATT ACACAACGAG CTCATACACC AACACCAGGA ATATATTTAG GAAAACCTAC ACATTTACAT

Am-tra2285 GATAGAGGAT GGGATGGGCC TAGAAGAAGA GACAGTAGTT ATAGAGGAAG TTATCGACGT TCACCTAGCC CGTACTACAA TCGTCGTGCG GGTCTGTTATG
Am-tra2253 GATAGAGGAT GGGATGGGCC TAGAAGAAGA GACAGTAGTT ATAGAGGAAG TTATCGACGT TCACCTAGCC CGTACTACAA TCGTCGTGCG GGTCTGTTATG
Am-tra2234 GATAGAGGAT GGGATGGGCC TAGAAGAAGA GACAGTAGTT ATAGAGGAAG TTATCGACGT TCACCTAGCC CGTACTACAA TCGTCGTGCG GGTCTGTTATG

Am-tra2285 ACAGATCTCG ATCACGCTCT TATTCACCAC GTCGATATTA AGTGACACGA GTGTGATGCG AGAGGCCAGA TGTTTGGGAG ACCATTTATG TGACTTGACC
Am-tra2253 ACAGATCTCG ATCACGCTCT TATTCACCAC GTCGATATTA AGTGACACGA GTGTGATGCG AGAGGCCAGA TGTTTGGGAG ACCATTTATG TGACTTGACC
Am-tra2234 ACAGATCTCG ATCACGCTCT TATTCACCAC GTCGATATTA AGTGACACGA GTGTGATGCG AGAGGCCAGA TGTTTGGGAG ACCATTTATG TGACTTGACC

Am-tra2285 CTTTGACCTC AAATTTCTTC TAACAATACT GTACCGGGTC AAAAAAAAAA GCAAAATGCTA CATTCTTACT ACTATTCTTA CTTTACCTAG TTCTGCATCA
Am-tra2253 CTTTGACCTC AAATTTCTTC TAACAATACT GTACCGGGTC AAAAAAAAAA GCAAAATGCTA CATTCTTACT ACTATTCTTA CTTTACCTAG TTCTGCATCA
Am-tra2234 CTTTGACCTC AAATTTCTTC TAACAATACT GTACCGGGTC AAAAAAAAAA GCAAAATGCTA CATTCTTACT ACTATTCTTA CTTTACCTAG TTCTGCATCA

Am-tra2285 TATGCAATTA ATTACAGCAT TTAAATTACG ATATTGTAAA ATATCAATTA ATGAAATAAC CTAATATGCA AAGGAGTATA GTATATTCTT TGCATGAAAG
Am-tra2253 TATGCAATTA ATTACAGCAT TTAAATTACG ATATTGTAAA ATATCAATTA ATGAAATAAC CTAATATGCA AAGGAGTATA GTATATTCTT TGCATGAAAG
Am-tra2234 TATGCAATTA ATTACAGCAT TTAAATTACG ATATTGTAAA ATATCAATTA ATGAAATAAC CTAATATGCA AAGGAGTATA GTATATTCTT TGCATGAAAG

Am-tra2285 AGTAAGGTTA GAATGGATAA AAACCTTATT TTCATAATGT TTCTATTATT TTCTGGATGA ATTTTTATGA AGATAAGGTT TATTTATTGT AACGGTATGA
Am-tra2253 AGTAAGGTTA GAATGGATAA AAACCTTATT TTCATAATGT TTCTATTATT TTCTGGATGA ATTTTTATGA AGATAAGGTT TATTTATTGT AACGGTATGA
Am-tra2234 AGTAAGGTTA GAATGGATAA AAACCTTATT TTCATAATGT TTCTATTATT TTCTGGATGA ATTTTTATGA AGATAAGGTT TATTTATTGT AACGGTATGA

Am-tra2285 TACTGATATG TGAAGGTTGG AATATAATTG TTTCCATTTT TCTTTGACTT TAATTATTGG CTTAAAAAAT ATATTCCAGC CATTCCGATC TTAATATCA
Am-tra2253 TACTGATATG TGAAGGTTGG AATATAATTG TTTCCATTTT TCTTTGACTT TAATTATTGG CTTAAAAAAT ATATTCCAGC CATTCCGATC TTAATATCA
Am-tra2234 TACTGATATG TGAAGGTTGG AATATAATTG TTTCCATTTT TCTTTGACTT TAATTATTGG CTTAAAAAAT ATATTCCAGC CATTCCGATC TTAATATCA

Am-tra2285 C
Am-tra2253 C
Am-tra2234 C

```

**Figure S1** Multiple Nucleotide Sequence Alignment of the Am-tra2 cDNAs Am-tra2<sup>285</sup>, Am-tra2<sup>253</sup>, Am-tra2<sup>234</sup>. Black (dsRNA-2) and grey (dsRNA-1) boxes mark the region that we used to produce our dsRNAs.
