# Supplementary material
Source: PubMed Central journal article supplement (PMC3522149)
Supplement: 81ba10be1a6ceaa9c004e138b0930335_genetics.112.143925-1.pdf [file 81ba10be1a6ceaa9c004e138b0930335_genetics.112.143925-1.pdf]

```

Am-tra2285 TACTGACGCC ACAGCGCATT GTTCTGAACG TTTAATCGGT TTTTGCTACA TTTATTCTAT TTAAGTTTC ATAATGAGTG ACATTGAGCG
Am-tra2253 TACTGACGCC ACAGCGCATT GTTCTGAACG TTTAATCGGT TTTTGCTACA TTTATTCTAT TTAAGTTTC ATAATGAGTG ACATTGAGCG
Am-tra2234 TACTGACGCC ACAGCGCATT GTTCTGAACG TTTAATCGGT TTTTGCTACA TTTATTCTAT TTAAGTTTC ATAATGAGTG ACATTGAGCG

Am-tra2285 AAGTAGTAGT CGTAGTGCAA GTCCTAGAAG ACCAAGAACA GCAGATGGTG GTTTAAGAGA CTCGCGTTCA CATTCAAGAT CACGTAAATC ACGAGAGCGT
Am-tra2253 AAGTAGTAGT CGTAGTGCAA GTCCTAGAAG ACCAAGAACA GCAGATGGTG GTTTAAGAGA CTCGCGTTCA CATTCAAGAT CACGTAAATC ACGAGAGCGT
Am-tra2234 AAGTAGTAGT CGTAGTGCAA GTCCTAGAAG ACCAAGAACA GCAGATGGTG GTTTAAGAGA CTCGCGTTCA CATTCAAGAT CACGTAAATC ACGAGAGCGT

Am-tra2285 AAAGAATCGC ACCGACCAGT AAAAGAATAT TCAAGATCAC GAAGCCGTTT AGTGTCAAGA GGAAGAAAGT CCTATCGTAG CAGCAAATAT GCCAGTGCAG
Am-tra2253 AAAGAATCGC ACCGACCAGT AAAAGAATAT TCAAGATCAC GAAGCCGTTT AGTGTCAAGA GGAAGAAAGT CCTATCGTAG CAGCAAATAT GCCAGTGCAG
Am-tra2234 AAAGAATCGC ACCGACCAGT AAAAGAATAT TCAAGATCAC GAAGCCGTTT AGTGTCAAGA GGAAGAAAGT CCTATCGTAG CAGCAAATAT GCCAGTGCAG

Am-tra2285 GTCATCGTGG TAGTAGTCGC AGTCGTAGTC GCAGCCGTAG TCGTCTACT CACAGGTTT CGCGATATTC CGAAGCAGA TCTCGATCAT ACTCCGTTT
Am-tra2253 GTCATCGTGG TAGTAGTCGC AGTCGTAGTC GCAGCCGTAG TCGTCTACT CACAG----- ----- ----- ----- -----
Am-tra2234 GTCATCGTGG TAGTAGTCGC AGTCGTAGTC GCAGCCGTAG TCGTCTACT CACAG----- ----- ----- ----- -----

Am-tra2285 TCGTACTCT CGCGAATGTG ATAGGACCAT TTAGTCTTCA CACTCCCGCA GTCCAATGTC ATCTAGACGA CGTCATGTTG GAAACAGGGA AAATCCCTCT
Am-tra2253 ----- ----- ----- ----- ----- -TCCAATGTC ATCTAGACGA CGTCATGTTG GAAACAGGGA AAATCCCTCT
Am-tra2234 ----- ----- ----- ----- ----- -TCCAATGTC ATCTAGACGA CGTCATGTTG GAAACAGGGA AAATCCCTCT

Am-tra2285 CCTTCCAGAT GCTTAGGTGT ATTTGGACTT TCTATTTTTA CAACCGAACA GCAAGTACAT CACATCTTTT CCAAATATGG TCCTGTTGAA CGTATACAAG
Am-tra2253 CCTTCCAGAT GCTTAGGTGT ATTTGGACTT TCTATTTTTA CAACCGAACA GCAAGTACAT CACATCTTTT CCAAATATGG TCCTGTTGAA CGTATACAAG
Am-tra2234 -----AT GCTTAGGTGT ATTTGGACTT TCTATTTTTA CAACCGAACA GCAAGTACAT CACATCTTTT CCAAATATGG TCCTGTTGAA CGTATACAAG

Am-tra2285 TTGTAATTGA TGCAAAGACT GGGCATTCTA AAGGATATTG TTTTGATAT TTTGAATCAC TTGAAGATGC TAAAGTAGCA AAAGAACAGT GTGCAGGAAT
Am-tra2253 TTGTAATTGA TGCAAAGACT GGGCATTCTA AAGGATATTG TTTTGATAT TTTGAATCAC TTGAAGATGC TAAAGTAGCA AAAGAACAGT GTGCAGGAAT
Am-tra2234 TTGTAATTGA TGCAAAGACT GGGCATTCTA AAGGATATTG TTTTGATAT TTTGAATCAC TTGAAGATGC TAAAGTAGCA AAAGAACAGT GTGCAGGAAT

Am-tra2285 GGAAATTGAT GGTAGAAGAA TGAGGGTAGA TTATTC AATT ACACAACGAG CTCATACACC AACACCAGGA ATATATTTAG GAAAACCTAC ACATTTACAT
Am-tra2253 GGAAATTGAT GGTAGAAGAA TGAGGGTAGA TTATTC AATT ACACAACGAG CTCATACACC AACACCAGGA ATATATTTAG GAAAACCTAC ACATTTACAT
Am-tra2234 GGAAATTGAT GGTAGAAGAA TGAGGGTAGA TTATTC AATT ACACAACGAG CTCATACACC AACACCAGGA ATATATTTAG GAAAACCTAC ACATTTACAT

Am-tra2285 GATAGAGGAT GGGATGGGCC TAGAAGAAGA GACAGTAGTT ATAGAGGAAG TTATCGACGT TCACCTAGCC CGTACTACAA TCGTCGTGCG GTCGTTATG
Am-tra2253 GATAGAGGAT GGGATGGGCC TAGAAGAAGA GACAGTAGTT ATAGAGGAAG TTATCGACGT TCACCTAGCC CGTACTACAA TCGTCGTGCG GTCGTTATG
Am-tra2234 GATAGAGGAT GGGATGGGCC TAGAAGAAGA GACAGTAGTT ATAGAGGAAG TTATCGACGT TCACCTAGCC CGTACTACAA TCGTCGTGCG GTCGTTATG

Am-tra2285 ACAGATCTCG ATCACGCTCT TATTCACCAC GTCGATATTA AGTGACACGA GTGTGATGCG AGAGGCCAGA TGTGTTGGGAG ACCATTTATG TGACTTGACC
Am-tra2253 ACAGATCTCG ATCACGCTCT TATTCACCAC GTCGATATTA AGTGACACGA GTGTGATGCG AGAGGCCAGA TGTGTTGGGAG ACCATTTATG TGACTTGACC
Am-tra2234 ACAGATCTCG ATCACGCTCT TATTCACCAC GTCGATATTA AGTGACACGA GTGTGATGCG AGAGGCCAGA TGTGTTGGGAG ACCATTTATG TGACTTGACC

Am-tra2285 CTTTGACCTC AAATTTCTTC TAACAATACT GTACCGGGTC AAAAAAAAAA GCAAAATGCTA CATTCTTACT ACTATTCTTA CTTTACCTAG TTCTGCATCA
Am-tra2253 CTTTGACCTC AAATTTCTTC TAACAATACT GTACCGGGTC AAAAAAAAAA GCAAAATGCTA CATTCTTACT ACTATTCTTA CTTTACCTAG TTCTGCATCA
Am-tra2234 CTTTGACCTC AAATTTCTTC TAACAATACT GTACCGGGTC AAAAAAAAAA GCAAAATGCTA CATTCTTACT ACTATTCTTA CTTTACCTAG TTCTGCATCA

Am-tra2285 TATGCAATTA ATTACAGCAT TTAAATTACG ATATTGTAAA ATATCAATTA ATGAAATAAC CTAATATGCA AAGGAGTATA GTATATTCTT TGCATGAAAG
Am-tra2253 TATGCAATTA ATTACAGCAT TTAAATTACG ATATTGTAAA ATATCAATTA ATGAAATAAC CTAATATGCA AAGGAGTATA GTATATTCTT TGCATGAAAG
Am-tra2234 TATGCAATTA ATTACAGCAT TTAAATTACG ATATTGTAAA ATATCAATTA ATGAAATAAC CTAATATGCA AAGGAGTATA GTATATTCTT TGCATGAAAG

Am-tra2285 AGTAAGGTTA GAATGGATAA AAACCTTATT TTCATAATGT TTCTATTATT TTCTGGATGA ATTTTTATGA AGATAAGGTT TATTTATTGT AACGGTATGA
Am-tra2253 AGTAAGGTTA GAATGGATAA AAACCTTATT TTCATAATGT TTCTATTATT TTCTGGATGA ATTTTTATGA AGATAAGGTT TATTTATTGT AACGGTATGA
Am-tra2234 AGTAAGGTTA GAATGGATAA AAACCTTATT TTCATAATGT TTCTATTATT TTCTGGATGA ATTTTTATGA AGATAAGGTT TATTTATTGT AACGGTATGA

Am-tra2285 TACTGATATG TGAAGGTTGG AATATAATTG TTTCCATTTT TCTTTGACTT TAATTATTGG CTTAAAAAAT ATATTCCAGC CATTCCGATC TTAATATCA
Am-tra2253 TACTGATATG TGAAGGTTGG AATATAATTG TTTCCATTTT TCTTTGACTT TAATTATTGG CTTAAAAAAT ATATTCCAGC CATTCCGATC TTAATATCA
Am-tra2234 TACTGATATG TGAAGGTTGG AATATAATTG TTTCCATTTT TCTTTGACTT TAATTATTGG CTTAAAAAAT ATATTCCAGC CATTCCGATC TTAATATCA

Am-tra2285 C
Am-tra2253 C
Am-tra2234 C

```

**Figure S1** Multiple Nucleotide Sequence Alignment of the Am-tra2 cDNAs Am-tra2<sup>285</sup>, Am-tra2<sup>253</sup>, Am-tra2<sup>234</sup>. Black (dsRNA-2) and grey (dsRNA-1) boxes mark the region that we used to produce our dsRNAs.

```

A.m.  MSDIER-SSSRASAPRRPRTADGGLRDSRSHSRSRKSRERKESHRPVKEYSRSRSRSVSRGRKSYRSSKYASAG-----HRG
D.m.  M~DREPLSSGRLHCSARYKHKRSASS-SSAGTTSSGHK-----DRRSD-----YDYCGS-----
B.m.  MSDREr-SRSRTRNGSREPVPKPAVM-SRGHSRSR-SR----TPPPPKATSR-----KYRSPMLTSGLTVDGRTHS

                                           RNP-2
A.m.  SRSRSRSRSRSTHRFARYSRSRRSYFRSRYRECDRTIYRSHSRSPMSSRRRHVGNR----ENPSPSRCLGVFGLSIFFT
D.m.  --RRHQRSSRRRSR----SRSSSESPP----PEPRHR-----SGRSSDRERMHKSR----EHPQASRCIGVFGLNTNTS
B.m.  RSRSRSGS-ARRGYR-SRHSRTRRSYS----PRGSYR--RSHSHSPMSSRRRHLDGRVRLLENPTPSRCLGVFGLSLYTT

                                           RNP-1
A.m.  EQQVHHIFSKYGPVERIQVVIDAKTGHSGKGYCFVYFESLEDAKVAKEQCAGMEIDGRMRVDYSITQRAHTPTPGIYLGKPT
D.m.  QHKVRELFNKYGPIERIQMVIDAQTQRSRGFCFIYFEKLSDARAADSCSGIEVDGRRIRVDFSITQRAHTPTPGVYLGRQP
B.m.  EQQINHHIFSKYGPVVKVQVVIDAKTGRSRGFCFVYFEDMEDAKIAKNECTGMEIDGRIRVDYSITQRAHTPTPGIYMGKPT

A.m.  H-----LHDRG---WDGPRR----RDSSYRGSYRRSPSP-YNRRRGYDRSRSR--SYSPRRY
D.m.  RG-KAPRSFSPPRRGRRVYHDRSASPYDNYRDYDRNDYDRNLRRSPSRNRYTRNR-SYSRSRSPQLRRTSSRY
B.m.  ISSRGDNGYDRRRDRDDCYRGGGGGGGYRE----RDYYHRGYRHRSPSP-HYRRTR-RYERERSY----SPRRY

```

**Figure S2** Multiple Sequence Alignment of the Tra2 proteins of *Apis mellifera* (*A.m.*), *Drosophila melanogaster* (*D.m.*) and *Bombyx mori* (*B.m.*). The RNA binding domain (RBD) is highlighted in black, and the linker region is highlighted in dark grey. The arginine-serine rich motifs (RS1 and RS2) are shown in light grey. The RNP-1 and RNP-2 sequence elements are marked by black bars.

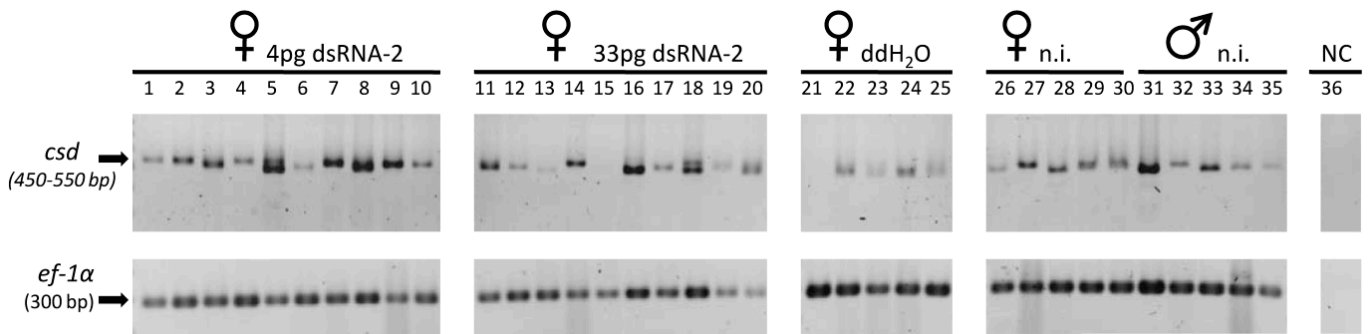

**Figure S3** Constitutive splicing of *csd* transcripts in *Am-tra2* dsRNA-2 treated embryos. The *csd* mRNAs of individuals 77-80 hours after egg-laying were studied using semiquantitative RT-PCR. Early embryos were injected with 4 pg of *Am-tra2* dsRNA-2 (lanes 1-10), 33 pg of *Am-tra2* dsRNA-2 (lanes 11-20) or ddH<sub>2</sub>O (lanes 21-25). The untreated female and male controls (labeled as n.i.) are shown in lanes 26-30 and 31-35, respectively. NC denotes our control PCR in which no cDNA was added (lane 36). Fragments corresponding to the *csd* transcripts including the hypervariable region (size of ~450-550 bp) were resolved by agarose gel electrophoresis and stained with ethidium bromide. The size of *csd* fragments varies due to length differences of the hypervariable that substantially varies between *csd* alleles. Because *csd* alleles can vary substantially in the nucleotide sequence (10-15%) we cannot amplify to the same extend all the *csd* alleles. We amplified cDNAs of the gene *elongation factor 1α* (*ef-1α*) as a relative control to semiquantify *csd* transcripts across embryonic samples.

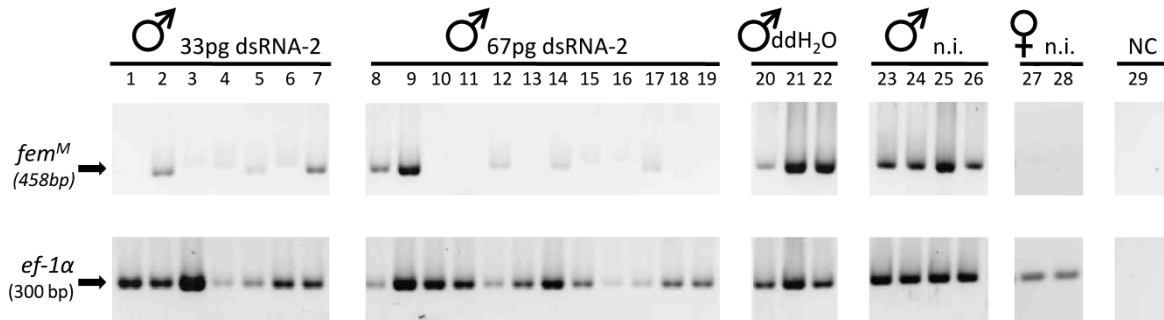

**Figure S4** *fem* transcripts in male embryos treated with *Am-tra2* dsRNA-2. The male *fem* mRNAs of individuals 48 hours after egg-laying were studied using semiquantitative RT-PCR. Early embryos were injected with 33 pg of *Am-tra2* dsRNA-2 (lanes 1-7), 67 pg of *Am-tra2* dsRNA-2 (lanes 8-19) or ddH<sub>2</sub>O (lanes 20-22). The untreated male and female controls (labeled as n.i.) are shown in lanes 23-26 and 27-28, respectively. NC denotes our control PCR in which no cDNA was added (lane 29). Fragments were resolved by agarose gel electrophoresis and stained with ethidium bromide. The corresponding fragment of the male *fem* transcripts has a size of 458 bp. We used amplification of the cDNAs of the gene *elongation factor 1α* (*ef-1α*) as a relative control to semiquantify *csd* transcripts across embryonic samples.

**Table S1 Sequences of oligonucleotides that were used**

---

| <b>to synthesize dsRNA</b>                    |                                                  |
|-----------------------------------------------|--------------------------------------------------|
| #22M: tra-2_ds_FOR                            | TAATACGACTCACTATAGGGCGAAGTCGTAGTCGCAGCCGTAGTCGTT |
| #23M: tra-2_ds_REV                            | TAATACGACTCACTATAGGGCGACTGGTGTGGTGTATGAGCTCGTTG  |
| #591                                          | TAATACGACTCACTATAGGGAGTCGTAGTCAAGTCCTAGAAGACC    |
| #592                                          | TAATACGACTCACTATAGGGATTTCCCTGTTTCCAACATGAC       |
| <b>to analyze <i>Am-dsx</i> splicing</b>      |                                                  |
| #417                                          | CTATTGGAGCACAGTAGCAAACCTG                        |
| #418                                          | GGCTACGTATGTTTAGGAGGACC                          |
| #419                                          | GAAACAATTTTGTTCAAAATAGAATTCC                     |
| <b>to analyze <i>fem</i> splicing</b>         |                                                  |
| #412                                          | CTGATTTTTCAATATTTACAGCTAAAACCTGTAC               |
| #523                                          | CAACATCTGATGAACTTAAACGG                          |
| #410                                          | TGAAGTTAATAACATATTTTAAATTCATCAATGAAG             |
| #566                                          | TGTACCATCTGAAGATTCTAATTTTTTCG                    |
| <b>to amplify <i>elongation factor-1α</i></b> |                                                  |
| #EM033                                        | CGTTCGTACCGATCTCCGGATG                           |
| #EM034                                        | GCTGCTGGAGCGAATGTTAC                             |
| <b>in 5'RACE experiments</b>                  |                                                  |
| 5'RACE OLLI:                                  | TGAACGGCTTCGTG                                   |
| <b>in 3'RACE experiments</b>                  |                                                  |
| #33M (3'RACE J1 OUTER)                        | ACT CTC GCG AAT GTG ATA GGA CCA T                |
| #34M (3'RACE J2 INNER)                        | TCA CAC TCC CGC AGT CCA ATG TCA T                |
| 3'RACE OLLI                                   | AGAACAGTGTGCAG                                   |
| <b>to clone full ORF of <i>Am-tra2</i></b>    |                                                  |
| #359                                          | GATCGGATCCATGAGTGACATTGAGCGAAGTAGTAG             |
| #421                                          | TGACACGCGTTTAAATATCGACGTGGTGAATAAGAGC            |
| <b>to amplify <i>csd</i> transcripts</b>      |                                                  |
| #CS-1                                         | ATGAAAAGAAAACCTTTTAGAAGAAAGAAC                   |
| #CS-2                                         | TAAAATTTTATAGTTTTCATTGATGCGTAG                   |

---
