# Supplementary material
Source: PubMed Central journal article supplement (PMC3522149)
Supplement: eb48d2c8535f5ebf0644ad2e56a23313_genetics.112.143925-4.pdf [file eb48d2c8535f5ebf0644ad2e56a23313_genetics.112.143925-4.pdf]

```

A.m.  MSDIER-SSSRASAPRRPRTADGGLRDSRSHSRSRKSRERKESHRPVKEYSRSRSRSVSRGRKSYRSSKYASAG-----HRG
D.m.  M~DREPLSSGRLHCSARYKHKRSASS-SSAGTTSSGHK-----DRRSD-----YDYCGS-----
B.m.  MSDREr-SRSRTRNGSREPVPKPAVM-SRGHSRSR-SR----TPPPPKATSR-----KYRSPMLTSGLTVDGRTHS

                                           RNP-2
A.m.  SRSRSRSRSRSTHRFARYSRSRRSYFRSRYRECDRTIYRSHSRSPMSSRRRHVGNR----ENPSPSRCLGVFGLSIFFT
D.m.  --RRHQRSSRRRSR----SRSSSESPP----PEPRHR-----SGRSSDRERMHKSR----EHPQASRCIGVFGLNTNTS
B.m.  RSRSRSGS-ARRGYR-SRHSRTRRSYS----PRGSYR--RSHSHSPMSSRRRHLDGRVRLLENPTPSRCLGVFGLSLYTT

                                           RNP-1
A.m.  EQQVHHIFSKYGPVERIQVVIDAKTGHSGKGYCFVYFESLEDAKVAKEQCAGMEIDGRMRVDYSITQRAHTPTPGIYLGKPT
D.m.  QHKVRELFNKYGPIERIQMVIDAQTQSRGFCFIYFEKLSDARAADSCSGIEVDGRRIRVDFSITQRAHTPTPGVYLGRQP
B.m.  EQQINHHIFSKYGPVQVVIDAKTGRSRGFCFVYFEDMEDAKIAKNECTGMEIDGRIRVDYSITQRAHTPTPGIYMGKPT

A.m.  H-----LHDRG---WDGPRR----RDSSYRGSYRRSPSP-YNRRRGYDRSRSR--SYSPRRY
D.m.  RG-KAPRSFSPRRGRRVYHDRSASPYDNYRDYDRNDYDRNLRRSPSRNRYTRNR-SYSRSRSPQLRRTSSRY
B.m.  ISSRGDNGYDRRRDRDDCYRGGGGGGGYRE----RDYYHRGYRHRSPSP-HYRRTR-RYERERSY----SPRRY

```

**Figure S2** Multiple Sequence Alignment of the Tra2 proteins of *Apis mellifera* (*A.m.*), *Drosophila melanogaster* (*D.m.*) and *Bombyx mori* (*B.m.*). The RNA binding domain (RBD) is highlighted in black, and the linker region is highlighted in dark grey. The arginine-serine rich motifs (RS1 and RS2) are shown in light grey. The RNP-1 and RNP-2 sequence elements are marked by black bars.
